# Supplementary material
Source: Royal Society of Chemistry journal article supplement (doi:10.1039/d6nj01235c)
Supplement: d6nj01235c1.pdf [file d6nj01235c1.pdf]

## *Supporting Information*

# **Replacing Carbazole with [2.2]Paracyclophane and Triptycene Donors: Theoretical Insights into the Modulation of Second-order Nonlinear Optical Properties**

Jin-Ting Ye<sup>a,b\*</sup>, Jin-Zhe Zhang<sup>a</sup>, Sarula Jin<sup>a</sup>, Yong-Qing Qiu<sup>c</sup>, Li-Hui Wang<sup>a</sup>, Feng-  
Yang Bai<sup>d\*</sup>

<sup>a</sup> College of Chemistry and Materials Science, Inner Mongolia Minzu University,  
Tongliao, 028000, China

<sup>b</sup> Inner Mongolia Key Laboratory of Solid State Chemistry for Battery, Tongliao,  
028000, China

<sup>c</sup> Institute of Functional Material Chemistry, Faculty of Chemistry, Northeast Normal  
University, Changchun, 130024, China

<sup>d</sup> Institute of Catalysis for Energy and Environment, College of Chemistry and  
Chemical Engineering, Shenyang Normal University, Shenyang, 110034, People's  
Republic of China

---

\* Corresponding Author.

E-mail addresses: [yejt571@nenu.edu.cn](mailto:yejt571@nenu.edu.cn) (J. T. Ye);  
[baify492@nenu.edu.cn](mailto:baify492@nenu.edu.cn) (F. Y. Bai);

## Computational details

The separation of the exchange term into a short-range DFT and a long-range HF is defined by the interelectronic distance  $r_{12}$  and the error function  $\text{erf}(x)$ <sup>1</sup> as following formula:

$$r_{12}^{-1} = r_{12}^{-1} \text{erfc}(\omega r_{12}) + r_{12}^{-1} \text{erf}(\omega r_{12}) \quad (1)$$

The range-separation parameter  $\omega$  represents the inverse of the distance at which the exchange changes from DFT-like to HF-like. In exact Kohn–Sham (KS) theory, the negative HOMO energy  $-\varepsilon_{\text{H}}(N)$  for an  $N$ -electron system should be equal to the vertical ionization potential (IP). This optimal tuning method, in brief, is determined nonempirically through minimizing the following equation:

$$J = |\varepsilon_{\text{H}}(N) + \text{IP}(N)| \quad (2)$$

A more refined target functional as shown below was proposed particularly for “better” description of HOMO–LUMO gap or transport gap:

$$J^2 = \sum_{i=0}^1 [\varepsilon_{\text{H}}(N+i) + \text{IP}(N+i)]^2 \quad (3)$$

The above equation simultaneously applies the IP criterion for both neutral ( $N$ ) and anion ( $N+1$ ) systems.

Champagne et al<sup>2</sup> developed an effective method to evaluate the hyper-Rayleigh scattering (HRS) response  $\beta_{\text{HRS}}(-2\omega; \omega, \omega)$ . The second-order NLO response that can be extracted by Bersohn’s expression:

$$\beta_{\text{HRS}}(-2\omega; \omega, \omega) = \sqrt{\langle \beta_{\text{ZZZ}}^2 \rangle + \langle \beta_{\text{ZXX}}^2 \rangle} \quad (3)$$

while the associated depolarization ratio (DR), which reveals the shape of the NLO-phore, given by:

$$\text{DR} = \frac{\langle \beta_{\text{ZZZ}}^2 \rangle}{\langle \beta_{\text{ZXX}}^2 \rangle} \quad (4)$$

$\langle \beta_{\text{ZZZ}}^2 \rangle$  and  $\langle \beta_{\text{ZXX}}^2 \rangle$  are the orientational average of the molecular  $\beta$  tensor components without assuming Kleinman’s conditions<sup>3, 4</sup>. Full expressions for the relationships between these averages (in the laboratory frame) and the molecular

tensor components (in the molecular frame) can be found in relative papers.<sup>5</sup>

$$\beta_{HRS} = \sqrt{(\beta_{HRS}^2)} = \sqrt{\frac{10}{45}|\beta_{J=1}|^2 + \frac{10}{105}|\beta_{J=3}|^2} \quad (5)$$

The  $\beta_{J=1}$  and  $\beta_{J=3}$  are the dipolar [ $\Phi_{J=1} = 1/(1+\rho)$ ] and octupolar [ $\Phi_{J=3} = \rho/(1+\rho)$ ] contributions to the HRS hyperpolarizability, respectively, where considered their absolute values. The relative contribution of the octupolar and dipolar components is given by the nonlinear anisotropy ratio  $\rho = |\beta_{J=3}|/|\beta_{J=1}|$ . Furthermore, assuming a general elliptically polarized incident light propagating along the X direction, with a state of polarization characterized by two angles ( $\Psi$ ,  $\delta$ ), the intensity of the harmonic light scattered at  $90^\circ$  along the Y direction, and vertically (V) polarized (along the Z axis) is given by the Bersohn's expression<sup>4, 5</sup>:

$$I_{\Psi V}^{2\omega} \propto \langle \beta_{ZXX}^2 \rangle \cos^4 \psi + \langle \beta_{ZZZ}^2 \rangle \sin^4 \psi + \sin^2 \psi \cos^2 \psi \langle (\beta_{ZZZ} + \beta_{ZZX})^2 - 2\beta_{ZZZ}\beta_{ZXX} \rangle \quad (6)$$

**Table S1** The  $\beta_{\text{tot}}$  values ( $\times 10^{-30}$  esu) of all studied molecules calculated at the  $\omega$ B97XD/6-3+G(d) level.

|            | Compound        | $\beta_x$ | $\beta_y$ | $\beta_z$ | $\beta_{\text{tot}}$ |
|------------|-----------------|-----------|-----------|-----------|----------------------|
|            | <b>CzPhTrz</b>  | -26.2     | 0.3       | -0.3      | 26.2                 |
| <b>Gas</b> | <b>CzpPhTrz</b> | -27.8     | 0.8       | 1.5       | 27.9                 |
|            | <b>TCz-Trz</b>  | -28.5     | 0.6       | -1.7      | 28.6                 |
|            | <b>CzPhTrz</b>  | -31.7     | 0.4       | -0.3      | 31.7                 |
| <b>PCM</b> | <b>CzpPhTrz</b> | -34.2     | 1.0       | 1.3       | 34.2                 |
|            | <b>TCz-Trz</b>  | -33.3     | 0.9       | -2.0      | 33.4                 |

**Table S2** The  $\beta_{\text{tot}}$  values ( $\times 10^{-30}$  esu) of all studied molecules calculated at the  $\omega$ B97XD methods with different basis set.

| Compound        | 6-31G(d,p) | 6-311G(d,p) | 6-3+G(d) | 6-311+G(d,p) | 6-311++G(d,p) |
|-----------------|------------|-------------|----------|--------------|---------------|
| <b>CzPhTrz</b>  | 26.7       | 26.5        | 26.2     | 26.0         | 26.0          |
| <b>CzpPhTrz</b> | 28.7       | 27.9        | 27.9     | 27.7         | 27.7          |
| <b>TCz-Trz</b>  | 28.9       | 29.0        | 28.6     | 28.6         | 28.6          |

**Table S3** The  $\beta_{\text{tot}}$  values ( $\times 10^{-30}$  esu) of all studied molecules calculated at the different methods with 6-31+G(d) basis set.

| Compound        | $\omega^*$ B97XD<br>( $\omega^*$ , bohr $^{-1}$ ) | CAM-<br>B3LYP | BHandHLYP | Toluene |
|-----------------|---------------------------------------------------|---------------|-----------|---------|
| <b>CzPhTrz</b>  | 36.3 (0.132)                                      | 30.6          | 29.3      | 31.7    |
| <b>CzpPhTrz</b> | 38.7 (0.135)                                      | 32.4          | 31.1      | 34.2    |
| <b>TCz-Trz</b>  | 41.3 (0.128)                                      | 33.6          | 32.4      | 33.4    |

**Table S4** The  $\gamma_{\text{tot}}$  values ( $\times 10^5$  a.u.) of all studied molecules calculated at the  $\omega\text{B97XD/6-3+G(d)}$  level in toluene.

| Compound        | $\gamma_x$ | $\gamma_y$ | $\gamma_z$ | $\gamma_{\text{tot}}$ |
|-----------------|------------|------------|------------|-----------------------|
| <b>CzPhTrz</b>  | 3.4        | 1.1        | 0.5        | 3.6                   |
| <b>CzpPhTrz</b> | 3.8        | 1.2        | 0.6        | 4.0                   |
| <b>TCz-Trz</b>  | 3.8        | 1.5        | 1.0        | 4.2                   |

## References

1. T. Yanai, D. P. Tew and N. C. Handy, Chem. Phys. Lett., 2004, 393, 51-57.
2. M. Guillaume, B. Champagne, N. Markova, V. Enchev and F. Castet, J. Phys. Chem. A, 2007, 111, 9914-9923.
3. C.-G. Liu and X.-H. Guan, J. Phys. Chem. C, 2013, 117, 7776-7783.
4. R. Bersohn, Y. H. Pao and H. L. Frisch, J. Chem. Phys., 1966, 45, 3184-3198.
5. F. Castet, E. Bogdan, A. Plaquet, L. Ducasse, B. Champagne and V. Rodriguez, J. Chem. Phys., 2012, 136, 024506.
